# Supplementary material
Source: PubMed Central journal article supplement (PMC3095592)
Supplement: halms560924-supplement_1.pdf [file halms560924-supplement_1.pdf]

**Supplementary table.** Fetal growth in relation to maternal total hair mercury level and average seafood intake before pregnancy (non-overweight women)

| n=486                                  | n   | <u>Model 1*</u>  |               | <u>Model 2*</u>  |               | <u>Model 3*</u>  |               |                  |               |
|----------------------------------------|-----|------------------|---------------|------------------|---------------|------------------|---------------|------------------|---------------|
|                                        |     | Mercury          |               | Seafood          |               | Mercury          |               | Seafood          |               |
|                                        |     | $\beta^{\Delta}$ | $p^{\dagger}$ | $\beta^{\Delta}$ | $p^{\dagger}$ | $\beta^{\Delta}$ | $p^{\dagger}$ | $\beta^{\Delta}$ | $p^{\dagger}$ |
| <b>ULTRASOUND MEASURES at 20-24 WG</b> |     |                  |               |                  |               |                  |               |                  |               |
| Biparietal diameter (mm)               | 455 | -0.30            | 0.05          | -0.08            | 0.57          | -0.31            | 0.05          | -0.02            | 0.9           |
| Head circumference (mm)                | 442 | -1.18            | 0.01          | -0.67            | 0.13          | -1.12            | 0.03          | -0.46            | 0.3           |
| Abdominal circumference (mm)           | 446 | -0.13            | 0.80          | -0.16            | 0.74          | -0.07            | 0.91          | -0.15            | 0.77          |
| Femoral length (mm)                    | 453 | -0.12            | 0.27          | -0.05            | 0.61          | -0.15            | 0.22          | -0.02            | 0.82          |
| <b>ULTRASOUND MEASURES at 30-34 WG</b> |     |                  |               |                  |               |                  |               |                  |               |
| Biparietal diameter (mm)               | 445 | 0.03             | 0.88          | -0.06            | 0.75          | 0.10             | 0.66          | -0.08            | 0.69          |
| Head circumference (mm)                | 438 | -0.04            | 0.96          | -1.04            | 0.17          | 0.44             | 0.63          | -1.11            | 0.15          |
| Abdominal circumference (mm)           | 441 | -0.52            | 0.54          | 0.11             | 0.88          | -0.48            | 0.59          | 0.20             | 0.79          |
| Femoral length (mm)                    | 442 | -0.26            | 0.07          | 0.11             | 0.39          | -0.36            | 0.02          | 0.18             | 0.18          |
| <b>ANTHROPOMETRIC MEASURES</b>         |     |                  |               |                  |               |                  |               |                  |               |
| Birthweight (g)                        | 439 | -14.79           | 0.49          | -23.69           | 0.21          | -5.93            | 0.80          | -22.59           | 0.24          |
| Birth length (cm)                      | 433 | -0.13            | 0.17          | -0.18            | 0.03          | -0.06            | 0.57          | -0.17            | 0.05          |
| Head circumference (cm)                | 438 | 0.04             | 0.51          | -0.17            | 0.001         | 0.08             | 0.19          | -0.19            | 0.005         |
| Sum of skinfolds (mm)                  | 435 | -0.06            | 0.55          | -0.08            | 0.36          | 0.00             | 0.99          | -0.08            | 0.37          |
| <b>OTHER MEASURES</b>                  |     |                  |               |                  |               |                  |               |                  |               |
| Gestational length (WA)                | 461 | -0.02            | 0.82          | 0.04             | 0.65          | -0.06            | 0.59          | 0.05             | 0.57          |
| Placental weight (g)                   | 269 | -6.52            | 0.44          | -6.44            | 0.34          | -4.80            | 0.61          | -5.53            | 0.43          |

<sup>Δ</sup>  $\beta$  corresponds to variation of the outcome variable for 1 SD of MeHg level (2.60) or seafood intake (7.75)

<sup>†</sup> Linear regression test

\* Adjusted for centre, maternal age and height, smoking during pregnancy, parity (yes/no), gestational length (at ultrasound measures or at delivery), delay between birth and anthropometric measures (except for ultrasound measures and gestational length) and newborn's sex. Model 1: association with MeHg level / Model 2: association with seafood intake / Model 3: association with MeHg level and seafood intake, mutually adjusted on each other
